# Supplementary material
Source: Springer Nature journal article supplement (https://www.springermedizin.de/resource/supplementary/12889_2010_2987_MOESM3_ESM.pdf/9487832)
Supplement: MOESM3 [file 9487832]

### Initial search

Any study meeting broad criteria:  
smoking, vehicles and children

517 citations from five electronic  
databases: MEDLINE, HMIC,  
EMBASE, PsychINFO, Social Policy  
and Practice

72 citations after  
first screen  
(title/abstract)

33 citations after  
second full-text  
screen

Additional  
citations:

|             |    |
|-------------|----|
| - pearling  | 21 |
| - RP        | 7  |
| - LO        | 1  |
| - by chance | 2  |

64 initial  
citations  
contributing to  
synthesis

### Iterative search: 'enforcement'

Any study meeting broad criteria:  
legislation and mobile phones OR  
child restraints (2 separate searches)

405 citations from five electronic  
databases: MEDLINE

88 citations after  
first screen  
(title/abstract)

22 citations after  
second full-text  
screen

Additional  
citations:  
- pearling 8

30 citations  
contributing to  
synthesis

### Iterative search: 'PM 2.5 issue'

Any study meeting broad criteria:  
particulate matter and smoking

59 citations from five electronic  
databases: MEDLINE

4 citations after  
single screen

Additional  
citations:  
- pearling 1

5 citations  
contributing to  
synthesis  
(Total = 99)
